# Supplementary material for: The Human Phospholipase B-II Precursor (HPLBII-P) in Urine as a Novel Biomarker of Glomerular Activity in COVID-19 and Diabetes Mellitus
Source: Preprints.org preprint supplement (doi:10.20944/preprints202402.0736.v1), 2024-02-13
Supplement: Supplementary file 1 [file supplementary]

Supplementary table and figures


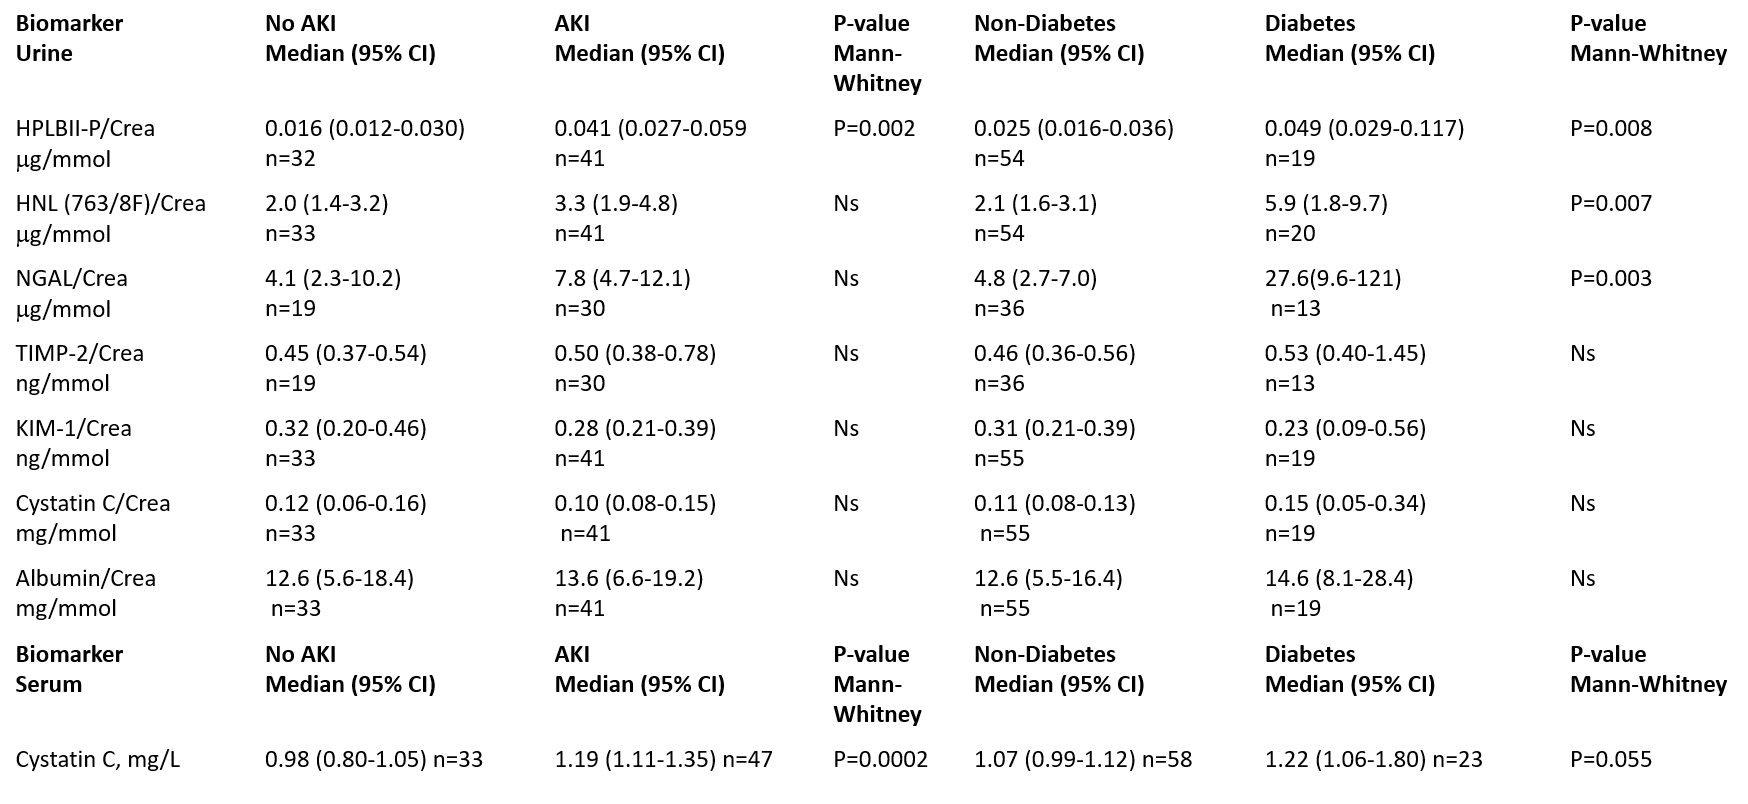


**COVID-19 study**

Biomarkers in urine corrected for urine Creatinine

Figure 1 supplement

Figure 2 supplement
